# Supplementary material for: Effect of Healthy Transitions intervention in improving family planning uptake among adolescents and young women in Western Nepal: A pre-and post-intervention study
Source: PubMed Central journal article supplement (PMC10256217; doi:10.1371/journal.pone.0286705), 2023-06-09
Supplement: pone.0286705.s001.pdf [file pone.0286705.s001.pdf]

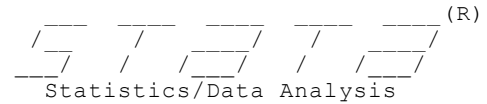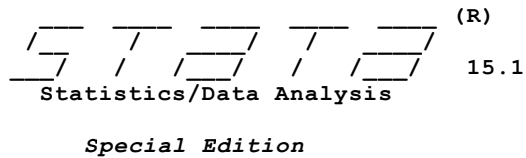

Copyright 1985-2017 StataCorp LLC  
StataCorp  
4905 Lakeway Drive  
College Station, Texas 77845 USA  
800-STATA-PC <http://www.stata.com>  
979-696-4600 [stata@stata.com](mailto:stata@stata.com)  
979-696-4601 (fax)

Single-user Stata perpetual license:  
Serial number: 401506250534  
Licensed to: Tara  
Research

Notes:

1. Unicode is supported; see [help unicode advice](#).
2. Maximum number of variables is set to 5000; see [help set maxvar](#).
3. New update available; type `-update all-`

Checking for updates...  
(contacting <http://www.stata.com>)

Update status

Last check for updates: **04 Apr 2023**  
New update available: **03 Feb 2020** ([what's new](#))  
Current update level: **21 Nov 2017** ([what's new](#))

Comment

**Stata 17 available**

Find out more: [stata.com/new-in-stata](http://stata.com/new-in-stata)

New features:

|                                  |                                     |
|----------------------------------|-------------------------------------|
| Tables                           | PyStata                             |
| Bayesian econometrics            | Jupyter Notebook with Stata         |
| Interval-censored Cox model      | Faster Stata                        |
| Differences-in-differences (DID) | Bayesian multilevel modeling        |
| Bayesian VAR                     | New functions for dates and times   |
| Multivariate meta-analysis       | Leave-one-out meta-analysis         |
| Treatment-effects lasso          | Galbraith plots                     |
| Panel-data multinomial logit     | Bayesian panel-data models          |
| Zero-inflated ordered logit      | Nonparametric tests for trend       |
| Bayesian IRF and FEVD analysis   | Lasso with clustered data           |
| Bayesian dynamic forecasting     | BIC for lasso penalty selection     |
| Do-file Editor enhancements      | Bayesian linear and nonlinear DSGEs |
| Intel Math Kernel Library (MKL)  | H2O integration                     |
| Stata on Apple Silicon           | Java integration                    |
| JDBC                             |                                     |

[and more](#)

Possible actions

[Install available updates](#) (or type `-update all-`)

Click to [edit automatic update checking preferences](#)

```
1 . use "C:\Users\r.bhandari\Downloads\HTNYP_public_use.dta"
2 . mcc round S316
```

| Cases     | Controls |           | Total |
|-----------|----------|-----------|-------|
|           | Exposed  | Unexposed |       |
| Exposed   | 329      | 0         | 329   |
| Unexposed | 0        | 0         | 0     |
| Total     | 329      | 0         | 329   |

McNemar's chi2(1) = . Prob > chi2 = .  
 Exact McNemar significance probability = 1.0000

Proportion with factor

| Cases      | 1 | [95% Conf. Interval] |           |
|------------|---|----------------------|-----------|
| Controls   | 1 |                      |           |
| difference | 0 | -.0030395            | .0030395  |
| ratio      | 1 | 1                    | 1         |
| rel. diff. | . | .                    | .         |
| odds ratio | . | .                    | . (exact) |

```
3 . mcc S316 round
```

| Cases     | Controls |           | Total |
|-----------|----------|-----------|-------|
|           | Exposed  | Unexposed |       |
| Exposed   | 329      | 0         | 329   |
| Unexposed | 0        | 0         | 0     |
| Total     | 329      | 0         | 329   |

McNemar's chi2(1) = . Prob > chi2 = .  
 Exact McNemar significance probability = 1.0000

Proportion with factor

| Cases      | 1 | [95% Conf. Interval] |           |
|------------|---|----------------------|-----------|
| Controls   | 1 |                      |           |
| difference | 0 | -.0030395            | .0030395  |
| ratio      | 1 | 1                    | 1         |
| rel. diff. | . | .                    | .         |
| odds ratio | . | .                    | . (exact) |

```
4 . tab round
```

| round | Freq. | Percent | Cum.   |
|-------|-------|---------|--------|
| 1     | 786   | 50.00   | 50.00  |
| 2     | 786   | 50.00   | 100.00 |
| Total | 1,572 | 100.00  |        |

5 . tab S316

| S316. Are you currently doing something or using any method to delay or avoid ge | Freq.      | Percent       | Cum.          |
|----------------------------------------------------------------------------------|------------|---------------|---------------|
| Yes                                                                              | <b>168</b> | <b>51.06</b>  | <b>51.06</b>  |
| No                                                                               | <b>161</b> | <b>48.94</b>  | <b>100.00</b> |
| Total                                                                            | <b>329</b> | <b>100.00</b> |               |

6 . tab round S316

| round | S316. Are you currently doing something or using any method to delay or avoid ge |            | Total      |
|-------|----------------------------------------------------------------------------------|------------|------------|
|       | Yes                                                                              | No         |            |
| 1     | <b>87</b>                                                                        | <b>77</b>  | <b>164</b> |
| 2     | <b>81</b>                                                                        | <b>84</b>  | <b>165</b> |
| Total | <b>168</b>                                                                       | <b>161</b> | <b>329</b> |

7 . mcc round S316

| Cases     | Controls   |           | Total      |
|-----------|------------|-----------|------------|
|           | Exposed    | Unexposed |            |
| Exposed   | <b>329</b> | <b>0</b>  | <b>329</b> |
| Unexposed | <b>0</b>   | <b>0</b>  | <b>0</b>   |
| Total     | <b>329</b> | <b>0</b>  | <b>329</b> |

McNemar's chi2(1) = . Prob > chi2 = .  
 Exact McNemar significance probability = 1.0000

Proportion with factor

|            |          |                      |                 |
|------------|----------|----------------------|-----------------|
| Cases      | <b>1</b> |                      |                 |
| Controls   | <b>1</b> | [95% Conf. Interval] |                 |
| difference | <b>0</b> | <b>-.0030395</b>     | <b>.0030395</b> |
| ratio      | <b>1</b> | <b>1</b>             | <b>1</b>        |
| rel. diff. | .        | .                    | .               |
| odds ratio | .        | .                    | . (exact)       |

8 . tab b\_evmar

| Baseline:<br>Ever<br>married | Freq. | Percent | Cum.   |
|------------------------------|-------|---------|--------|
| No                           | 992   | 63.10   | 63.10  |
| Yes                          | 580   | 36.90   | 100.00 |
| Total                        | 1,572 | 100.00  |        |

9 . tab round b\_evmar

| round | Baseline: Ever<br>married |     | Total |
|-------|---------------------------|-----|-------|
|       | No                        | Yes |       |
| 1     | 496                       | 290 | 786   |
| 2     | 496                       | 290 | 786   |
| Total | 992                       | 580 | 1,572 |

10 . tab round S316

| round | S316. Are you<br>currently doing<br>something or using<br>any method to delay<br>or avoid ge |     | Total |
|-------|----------------------------------------------------------------------------------------------|-----|-------|
|       | Yes                                                                                          | No  |       |
| 1     | 87                                                                                           | 77  | 164   |
| 2     | 81                                                                                           | 84  | 165   |
| Total | 168                                                                                          | 161 | 329   |

11 . mcci 87 77 81 84

| Cases     | Controls |           | Total |
|-----------|----------|-----------|-------|
|           | Exposed  | Unexposed |       |
| Exposed   | 87       | 77        | 164   |
| Unexposed | 81       | 84        | 165   |
| Total     | 168      | 161       | 329   |

McNemar's chi2(1) = 0.10 Prob > chi2 = 0.7503

Exact McNemar significance probability = 0.8115

Proportion with factor

|            |           |                      |                  |
|------------|-----------|----------------------|------------------|
| Cases      | .4984802  |                      |                  |
| Controls   | .5106383  | [95% Conf. Interval] |                  |
| difference | -.0121581 | -.0900686            | .0657525         |
| ratio      | .9761905  | .8415413             | 1.132384         |
| rel. diff. | -.0248447 | -.1797548            | .1300654         |
| odds ratio | .9506173  | .6867165             | 1.315003 (exact) |

12 . mcc round S316 if b\_evmar ==1

| Cases     | Controls |           | Total |
|-----------|----------|-----------|-------|
|           | Exposed  | Unexposed |       |
| Exposed   | 323      | 0         | 323   |
| Unexposed | 0        | 0         | 0     |
| Total     | 323      | 0         | 323   |

McNemar's chi2(1) = . Prob > chi2 = .  
 Exact McNemar significance probability = 1.0000

Proportion with factor

|            |   |                      |           |
|------------|---|----------------------|-----------|
| Cases      | 1 |                      |           |
| Controls   | 1 | [95% Conf. Interval] |           |
| difference | 0 | -.003096             | .003096   |
| ratio      | 1 | 1                    | 1         |
| rel. diff. | . | .                    | .         |
| odds ratio | . | .                    | . (exact) |

13 . mcc round S316

| Cases     | Controls |           | Total |
|-----------|----------|-----------|-------|
|           | Exposed  | Unexposed |       |
| Exposed   | 329      | 0         | 329   |
| Unexposed | 0        | 0         | 0     |
| Total     | 329      | 0         | 329   |

McNemar's chi2(1) = . Prob > chi2 = .  
 Exact McNemar significance probability = 1.0000

Proportion with factor

|            |   |                      |           |
|------------|---|----------------------|-----------|
| Cases      | 1 |                      |           |
| Controls   | 1 | [95% Conf. Interval] |           |
| difference | 0 | -.0030395            | .0030395  |
| ratio      | 1 | 1                    | 1         |
| rel. diff. | . | .                    | .         |
| odds ratio | . | .                    | . (exact) |

14 . mcci 29 71 38 62

| Cases     | Controls |           | Total |
|-----------|----------|-----------|-------|
|           | Exposed  | Unexposed |       |
| Exposed   | 29       | 71        | 100   |
| Unexposed | 38       | 62        | 100   |
| Total     | 67       | 133       | 200   |

McNemar's chi2(1) = 9.99 Prob > chi2 = 0.0016  
 Exact McNemar significance probability = 0.0020

Proportion with factor

|            |          |                      |          |
|------------|----------|----------------------|----------|
| Cases      | .5       |                      |          |
| Controls   | .335     | [95% Conf. Interval] |          |
| difference | .165     | .0602751             | .2697249 |
| ratio      | 1.492537 | 1.1624               | 1.916438 |
| rel. diff. | .2481203 | .1147117             | .3815289 |

odds ratio **1.868421** **1.242935** **2.848266** (exact)

15 . mcci 26 74 33 67

| Cases     | Controls |           | Total |
|-----------|----------|-----------|-------|
|           | Exposed  | Unexposed |       |
| Exposed   | 26       | 74        | 100   |
| Unexposed | 33       | 67        | 100   |
| Total     | 59       | 141       | 200   |

McNemar's chi2(1) = **15.71** Prob > chi2 = **0.0001**  
 Exact McNemar significance probability = **0.0001**

Proportion with factor

|            |          |                      |                  |
|------------|----------|----------------------|------------------|
| Cases      | .5       |                      |                  |
| Controls   | .295     | [95% Conf. Interval] |                  |
| difference | .205     | .1026927             | .3073073         |
| ratio      | 1.694915 | 1.301721             | 2.206876         |
| rel. diff. | .2907801 | .1696893             | .411871          |
| odds ratio | 2.242424 | 1.46892              | 3.490135 (exact) |

16 . mcci 92 8 99 1

| Cases     | Controls |           | Total |
|-----------|----------|-----------|-------|
|           | Exposed  | Unexposed |       |
| Exposed   | 92       | 8         | 100   |
| Unexposed | 99       | 1         | 100   |
| Total     | 191      | 9         | 200   |

McNemar's chi2(1) = **77.39** Prob > chi2 = **0.0000**  
 Exact McNemar significance probability = **0.0000**

Proportion with factor

|            |           |                      |                  |
|------------|-----------|----------------------|------------------|
| Cases      | .5        |                      |                  |
| Controls   | .955      | [95% Conf. Interval] |                  |
| difference | -.455     | -.5393695            | -.3706305        |
| ratio      | .5235602  | .452123              | .6062847         |
| rel. diff. | -10.11111 | -17.62001            | -2.602213        |
| odds ratio | .0808081  | .0339451             | .1655169 (exact) |

17 . mcci 92 7 99 1

| Cases     | Controls |           | Total |
|-----------|----------|-----------|-------|
|           | Exposed  | Unexposed |       |
| Exposed   | 92       | 7         | 99    |
| Unexposed | 99       | 1         | 100   |
| Total     | 191      | 8         | 199   |

McNemar's chi2(1) = **79.85** Prob > chi2 = **0.0000**  
 Exact McNemar significance probability = **0.0000**

Proportion with factor

|            |                  |                  |                         |
|------------|------------------|------------------|-------------------------|
| Cases      | <b>.4974874</b>  |                  |                         |
| Controls   | <b>.959799</b>   |                  | [95% Conf. Interval]    |
| difference | <b>-.4623116</b> | <b>-.5458006</b> | <b>-.3788225</b>        |
| ratio      | <b>.5183246</b>  | <b>.4475801</b>  | <b>.600251</b>          |
| rel. diff. | <b>-11.5</b>     | <b>-20.41797</b> | <b>-2.582029</b>        |
| odds ratio | <b>.0707071</b>  | <b>.0277078</b>  | <b>.1511951</b> (exact) |

18 . mcci 39 61 63 37

| Cases     | Controls   |           | Total      |
|-----------|------------|-----------|------------|
|           | Exposed    | Unexposed |            |
| Exposed   | <b>39</b>  | <b>61</b> | <b>100</b> |
| Unexposed | <b>63</b>  | <b>37</b> | <b>100</b> |
| Total     | <b>102</b> | <b>98</b> | <b>200</b> |

McNemar's chi2(1) = **0.03** Prob > chi2 = **0.8575**  
 Exact McNemar significance probability = **0.9285**

Proportion with factor

|            |                  |                  |                         |
|------------|------------------|------------------|-------------------------|
| Cases      | <b>.5</b>        |                  |                         |
| Controls   | <b>.51</b>       |                  | [95% Conf. Interval]    |
| difference | <b>-.01</b>      | <b>-.1241174</b> | <b>.1041174</b>         |
| ratio      | <b>.9803922</b>  | <b>.789856</b>   | <b>1.216891</b>         |
| rel. diff. | <b>-.0204082</b> | <b>-.2453757</b> | <b>.2045594</b>         |
| odds ratio | <b>.968254</b>   | <b>.6695969</b>  | <b>1.399301</b> (exact) |

19 . mcci 67 37 33 63

| Cases     | Controls   |            | Total      |
|-----------|------------|------------|------------|
|           | Exposed    | Unexposed  |            |
| Exposed   | <b>67</b>  | <b>37</b>  | <b>104</b> |
| Unexposed | <b>33</b>  | <b>63</b>  | <b>96</b>  |
| Total     | <b>100</b> | <b>100</b> | <b>200</b> |

McNemar's chi2(1) = **0.23** Prob > chi2 = **0.6326**  
 Exact McNemar significance probability = **0.7202**

Proportion with factor

|            |                 |                  |                        |
|------------|-----------------|------------------|------------------------|
| Cases      | <b>.52</b>      |                  |                        |
| Controls   | <b>.5</b>       |                  | [95% Conf. Interval]   |
| difference | <b>.02</b>      | <b>-.0669443</b> | <b>.1069443</b>        |
| ratio      | <b>1.04</b>     | <b>.8855227</b>  | <b>1.221426</b>        |
| rel. diff. | <b>.04</b>      | <b>-.1206692</b> | <b>.2006692</b>        |
| odds ratio | <b>1.121212</b> | <b>.6821639</b>  | <b>1.84999</b> (exact) |

20 . mcci 67 33 37 63

| Cases     | Controls |           | Total |
|-----------|----------|-----------|-------|
|           | Exposed  | Unexposed |       |
| Exposed   | 67       | 33        | 100   |
| Unexposed | 37       | 63        | 100   |
| Total     | 104      | 96        | 200   |

McNemar's chi2(1) = 0.23 Prob > chi2 = 0.6326  
 Exact McNemar significance probability = 0.7202

Proportion with factor

|            |           |                      |                  |
|------------|-----------|----------------------|------------------|
| Cases      | .5        |                      |                  |
| Controls   | .52       | [95% Conf. Interval] |                  |
| difference | -.02      | -.1069443            | .0669443         |
| ratio      | .9615385  | .8187155             | 1.129277         |
| rel. diff. | -.0416667 | -.2160039            | .1326706         |
| odds ratio | .8918919  | .5405435             | 1.465923 (exact) |

21 . mcci 27 38 73 62

| Cases     | Controls |           | Total |
|-----------|----------|-----------|-------|
|           | Exposed  | Unexposed |       |
| Exposed   | 27       | 38        | 65    |
| Unexposed | 73       | 62        | 135   |
| Total     | 100      | 100       | 200   |

McNemar's chi2(1) = 11.04 Prob > chi2 = 0.0009  
 Exact McNemar significance probability = 0.0012

Proportion with factor

|            |          |                      |                 |
|------------|----------|----------------------|-----------------|
| Cases      | .325     |                      |                 |
| Controls   | .5       | [95% Conf. Interval] |                 |
| difference | -.175    | -.2803585            | -.0696415       |
| ratio      | .65      | .5031291             | .8397447        |
| rel. diff. | -.35     | -.5899255            | -.1100745       |
| odds ratio | .5205479 | .3421121             | .780705 (exact) |

22 . mcci 31 38 69 62

| Cases     | Controls |           | Total |
|-----------|----------|-----------|-------|
|           | Exposed  | Unexposed |       |
| Exposed   | 31       | 38        | 69    |
| Unexposed | 69       | 62        | 131   |
| Total     | 100      | 100       | 200   |

McNemar's chi2(1) = 8.98 Prob > chi2 = 0.0027  
 Exact McNemar significance probability = 0.0035

Proportion with factor

|            |       |                      |           |
|------------|-------|----------------------|-----------|
| Cases      | .345  |                      |           |
| Controls   | .5    | [95% Conf. Interval] |           |
| difference | -.155 | -.2590679            | -.0509321 |
| ratio      | .69   | .5405683             | .8807397  |
| rel. diff. | -.31  | -.5420468            | -.0779532 |



odds ratio **.5507246** **.360556** **.8298786** (exact)

23 . mcci 24 31 76 69

| Cases     | Controls   |            | Total      |
|-----------|------------|------------|------------|
|           | Exposed    | Unexposed  |            |
| Exposed   | <b>24</b>  | <b>31</b>  | <b>55</b>  |
| Unexposed | <b>76</b>  | <b>69</b>  | <b>145</b> |
| Total     | <b>100</b> | <b>100</b> | <b>200</b> |

McNemar's chi2(1) = **18.93** Prob > chi2 = **0.0000**  
 Exact McNemar significance probability = **0.0000**

Proportion with factor

|            |                 |                      |                         |
|------------|-----------------|----------------------|-------------------------|
| Cases      | <b>.275</b>     |                      |                         |
| Controls   | <b>.5</b>       | [95% Conf. Interval] |                         |
| difference | <b>-.225</b>    | <b>-.3264548</b>     | <b>-.1235452</b>        |
| ratio      | <b>.55</b>      | <b>.4184441</b>      | <b>.7229161</b>         |
| rel. diff. | <b>-.45</b>     | <b>-.6941316</b>     | <b>-.2058684</b>        |
| odds ratio | <b>.4078947</b> | <b>.2595654</b>      | <b>.6269852</b> (exact) |

24 . mcci 38 46 62 74

| Cases     | Controls   |            | Total      |
|-----------|------------|------------|------------|
|           | Exposed    | Unexposed  |            |
| Exposed   | <b>38</b>  | <b>46</b>  | <b>84</b>  |
| Unexposed | <b>62</b>  | <b>74</b>  | <b>136</b> |
| Total     | <b>100</b> | <b>120</b> | <b>220</b> |

McNemar's chi2(1) = **2.37** Prob > chi2 = **0.1237**  
 Exact McNemar significance probability = **0.1486**

Proportion with factor

|            |                  |                      |                         |
|------------|------------------|----------------------|-------------------------|
| Cases      | <b>.3818182</b>  |                      |                         |
| Controls   | <b>.4545455</b>  | [95% Conf. Interval] |                         |
| difference | <b>-.0727273</b> | <b>-.1693569</b>     | <b>.0239023</b>         |
| ratio      | <b>.84</b>       | <b>.6726081</b>      | <b>1.049051</b>         |
| rel. diff. | <b>-.1333333</b> | <b>-.3140331</b>     | <b>.0473664</b>         |
| odds ratio | <b>.7419355</b>  | <b>.4953696</b>      | <b>1.104154</b> (exact) |

25 . mcci 29 36 71 64

| Cases     | Controls   |            | Total      |
|-----------|------------|------------|------------|
|           | Exposed    | Unexposed  |            |
| Exposed   | <b>29</b>  | <b>36</b>  | <b>65</b>  |
| Unexposed | <b>71</b>  | <b>64</b>  | <b>135</b> |
| Total     | <b>100</b> | <b>100</b> | <b>200</b> |

McNemar's chi2(1) = **11.45** Prob > chi2 = **0.0007**  
 Exact McNemar significance probability = **0.0009**

Proportion with factor

|            |                 |                  |                         |
|------------|-----------------|------------------|-------------------------|
| Cases      | <b>.325</b>     |                  |                         |
| Controls   | <b>.5</b>       |                  | [95% Conf. Interval]    |
| difference | <b>-.175</b>    | <b>-.278426</b>  | <b>-.071574</b>         |
| ratio      | <b>.65</b>      | <b>.5054778</b>  | <b>.8358429</b>         |
| rel. diff. | <b>-.35</b>     | <b>-.5855629</b> | <b>-.1144371</b>        |
| odds ratio | <b>.5070423</b> | <b>.3297364</b>  | <b>.7675278</b> (exact) |

26 . mcci 35 50 65 50

| Cases     | Controls   |            | Total      |
|-----------|------------|------------|------------|
|           | Exposed    | Unexposed  |            |
| Exposed   | <b>35</b>  | <b>50</b>  | <b>85</b>  |
| Unexposed | <b>65</b>  | <b>50</b>  | <b>115</b> |
| Total     | <b>100</b> | <b>100</b> | <b>200</b> |

McNemar's chi2(1) = **1.96** Prob > chi2 = **0.1619**  
 Exact McNemar significance probability = **0.1915**

Proportion with factor

|            |                 |                  |                         |
|------------|-----------------|------------------|-------------------------|
| Cases      | <b>.425</b>     |                  |                         |
| Controls   | <b>.5</b>       |                  | [95% Conf. Interval]    |
| difference | <b>-.075</b>    | <b>-.1845761</b> | <b>.0345761</b>         |
| ratio      | <b>.85</b>      | <b>.6767224</b>  | <b>1.067646</b>         |
| rel. diff. | <b>-.15</b>     | <b>-.3753959</b> | <b>.0753959</b>         |
| odds ratio | <b>.7692308</b> | <b>.5211412</b>  | <b>1.129508</b> (exact) |

27 . mcci 26 43 74 67

| Cases     | Controls   |            | Total      |
|-----------|------------|------------|------------|
|           | Exposed    | Unexposed  |            |
| Exposed   | <b>26</b>  | <b>43</b>  | <b>69</b>  |
| Unexposed | <b>74</b>  | <b>67</b>  | <b>141</b> |
| Total     | <b>100</b> | <b>110</b> | <b>210</b> |

McNemar's chi2(1) = **8.21** Prob > chi2 = **0.0042**  
 Exact McNemar significance probability = **0.0053**

Proportion with factor

|            |                  |                  |                         |
|------------|------------------|------------------|-------------------------|
| Cases      | <b>.3285714</b>  |                  |                         |
| Controls   | <b>.4761905</b>  |                  | [95% Conf. Interval]    |
| difference | <b>-.147619</b>  | <b>-.2513406</b> | <b>-.0438975</b>        |
| ratio      | <b>.69</b>       | <b>.5345742</b>  | <b>.8906154</b>         |
| rel. diff. | <b>-.2818182</b> | <b>-.5000216</b> | <b>-.0636148</b>        |
| odds ratio | <b>.5810811</b>  | <b>.3894539</b>  | <b>.8574592</b> (exact) |

28 . mcci 26 43 74 75

| Cases     | Controls |           | Total |
|-----------|----------|-----------|-------|
|           | Exposed  | Unexposed |       |
| Exposed   | 26       | 43        | 69    |
| Unexposed | 74       | 75        | 149   |
| Total     | 100      | 118       | 218   |

McNemar's chi2(1) = 8.21 Prob > chi2 = 0.0042  
 Exact McNemar significance probability = 0.0053

Proportion with factor

|            |           |                      |                  |
|------------|-----------|----------------------|------------------|
| Cases      | .3165138  |                      |                  |
| Controls   | .4587156  | [95% Conf. Interval] |                  |
| difference | -.1422018 | -.2421882            | -.0422154        |
| ratio      | .69       | .5345742             | .8906154         |
| rel. diff. | -.2627119 | -.4646002            | -.0608236        |
| odds ratio | .5810811  | .3894539             | .8574592 (exact) |

29 . mcci 32 36 68 64

| Cases     | Controls |           | Total |
|-----------|----------|-----------|-------|
|           | Exposed  | Unexposed |       |
| Exposed   | 32       | 36        | 68    |
| Unexposed | 68       | 64        | 132   |
| Total     | 100      | 100       | 200   |

McNemar's chi2(1) = 9.85 Prob > chi2 = 0.0017  
 Exact McNemar significance probability = 0.0022

Proportion with factor

|            |          |                      |                  |
|------------|----------|----------------------|------------------|
| Cases      | .34      |                      |                  |
| Controls   | .5       | [95% Conf. Interval] |                  |
| difference | -.16     | -.2624479            | -.0575521        |
| ratio      | .68      | .5336314             | .8665158         |
| rel. diff. | -.32     | -.5496422            | -.0903578        |
| odds ratio | .5294118 | .3432716             | .8043097 (exact) |

30 . mcci 35 32 65 68

| Cases     | Controls |           | Total |
|-----------|----------|-----------|-------|
|           | Exposed  | Unexposed |       |
| Exposed   | 35       | 32        | 67    |
| Unexposed | 65       | 68        | 133   |
| Total     | 100      | 100       | 200   |

McNemar's chi2(1) = 11.23 Prob > chi2 = 0.0008  
 Exact McNemar significance probability = 0.0010

Proportion with factor

|            |       |                      |           |
|------------|-------|----------------------|-----------|
| Cases      | .335  |                      |           |
| Controls   | .5    | [95% Conf. Interval] |           |
| difference | -.165 | -.263769             | -.066231  |
| ratio      | .67   | .5292437             | .8481914  |
| rel. diff. | -.33  | -.5526177            | -.1073823 |

odds ratio **.4923077** **.3119173** **.7628627** (exact)

31 . mcci 34 33 66 67

| Cases     | Controls   |            | Total      |
|-----------|------------|------------|------------|
|           | Exposed    | Unexposed  |            |
| Exposed   | <b>34</b>  | <b>33</b>  | <b>67</b>  |
| Unexposed | <b>66</b>  | <b>67</b>  | <b>133</b> |
| Total     | <b>100</b> | <b>100</b> | <b>200</b> |

McNemar's chi2(1) = **11.00** Prob > chi2 = **0.0009**  
 Exact McNemar significance probability = **0.0012**

Proportion with factor

|            |              |                  |                      |         |
|------------|--------------|------------------|----------------------|---------|
| Cases      | <b>.335</b>  |                  |                      |         |
| Controls   | <b>.5</b>    |                  | [95% Conf. Interval] |         |
| difference | <b>-.165</b> | <b>-.2647876</b> | <b>-.0652124</b>     |         |
| ratio      | <b>.67</b>   | <b>.5279651</b>  | <b>.8502455</b>      |         |
| rel. diff. | <b>-.33</b>  | <b>-.5549011</b> | <b>-.1050989</b>     |         |
| odds ratio | <b>.5</b>    | <b>.3188376</b>  | <b>.7704782</b>      | (exact) |

32 . mcci 25 45 75 55

| Cases     | Controls   |            | Total      |
|-----------|------------|------------|------------|
|           | Exposed    | Unexposed  |            |
| Exposed   | <b>25</b>  | <b>45</b>  | <b>70</b>  |
| Unexposed | <b>75</b>  | <b>55</b>  | <b>130</b> |
| Total     | <b>100</b> | <b>100</b> | <b>200</b> |

McNemar's chi2(1) = **7.50** Prob > chi2 = **0.0062**  
 Exact McNemar significance probability = **0.0078**

Proportion with factor

|            |             |                  |                      |         |
|------------|-------------|------------------|----------------------|---------|
| Cases      | <b>.35</b>  |                  |                      |         |
| Controls   | <b>.5</b>   |                  | [95% Conf. Interval] |         |
| difference | <b>-.15</b> | <b>-.2603196</b> | <b>-.0396804</b>     |         |
| ratio      | <b>.7</b>   | <b>.5415638</b>  | <b>.9047873</b>      |         |
| rel. diff. | <b>-.3</b>  | <b>-.5447994</b> | <b>-.0552006</b>     |         |
| odds ratio | <b>.6</b>   | <b>.4051134</b>  | <b>.8797412</b>      | (exact) |

33 . mcci 25 42 75 58

| Cases     | Controls   |            | Total      |
|-----------|------------|------------|------------|
|           | Exposed    | Unexposed  |            |
| Exposed   | <b>25</b>  | <b>42</b>  | <b>67</b>  |
| Unexposed | <b>75</b>  | <b>58</b>  | <b>133</b> |
| Total     | <b>100</b> | <b>100</b> | <b>200</b> |

McNemar's chi2(1) = **9.31** Prob > chi2 = **0.0023**  
 Exact McNemar significance probability = **0.0029**

Proportion with factor

|            |              |                      |                         |
|------------|--------------|----------------------|-------------------------|
| Cases      | <b>.335</b>  |                      |                         |
| Controls   | <b>.5</b>    | [95% Conf. Interval] |                         |
| difference | <b>-.165</b> | <b>-.2735053</b>     | <b>-.0564947</b>        |
| ratio      | <b>.67</b>   | <b>.5171202</b>      | <b>.8680766</b>         |
| rel. diff. | <b>-.33</b>  | <b>-.5744932</b>     | <b>-.0855068</b>        |
| odds ratio | <b>.56</b>   | <b>.3743809</b>      | <b>.8277368</b> (exact) |

34 . mcci 33 38 67 62

| Cases     | Controls   |            | Total      |
|-----------|------------|------------|------------|
|           | Exposed    | Unexposed  |            |
| Exposed   | <b>33</b>  | <b>38</b>  | <b>71</b>  |
| Unexposed | <b>67</b>  | <b>62</b>  | <b>129</b> |
| Total     | <b>100</b> | <b>100</b> | <b>200</b> |

McNemar's chi2(1) = **8.01** Prob > chi2 = **0.0047**  
 Exact McNemar significance probability = **0.0060**

Proportion with factor

|            |                 |                      |                         |
|------------|-----------------|----------------------|-------------------------|
| Cases      | <b>.355</b>     |                      |                         |
| Controls   | <b>.5</b>       | [95% Conf. Interval] |                         |
| difference | <b>-.145</b>    | <b>-.248387</b>      | <b>-.041613</b>         |
| ratio      | <b>.71</b>      | <b>.5594286</b>      | <b>.9010981</b>         |
| rel. diff. | <b>-.29</b>     | <b>-.5181065</b>     | <b>-.0618935</b>        |
| odds ratio | <b>.5671642</b> | <b>.3705481</b>      | <b>.8568428</b> (exact) |

35 . mcci 27 36 73 64

| Cases     | Controls   |            | Total      |
|-----------|------------|------------|------------|
|           | Exposed    | Unexposed  |            |
| Exposed   | <b>27</b>  | <b>36</b>  | <b>63</b>  |
| Unexposed | <b>73</b>  | <b>64</b>  | <b>137</b> |
| Total     | <b>100</b> | <b>100</b> | <b>200</b> |

McNemar's chi2(1) = **12.56** Prob > chi2 = **0.0004**  
 Exact McNemar significance probability = **0.0005**

Proportion with factor

|            |                 |                      |                         |
|------------|-----------------|----------------------|-------------------------|
| Cases      | <b>.315</b>     |                      |                         |
| Controls   | <b>.5</b>       | [95% Conf. Interval] |                         |
| difference | <b>-.185</b>    | <b>-.2890485</b>     | <b>-.0809515</b>        |
| ratio      | <b>.63</b>      | <b>.48683</b>        | <b>.8152743</b>         |
| rel. diff. | <b>-.37</b>     | <b>-.6095089</b>     | <b>-.1304911</b>        |
| odds ratio | <b>.4931507</b> | <b>.3212931</b>      | <b>.7448074</b> (exact) |

36 . mcci 38 30 62 70

| Cases     | Controls |           | Total |
|-----------|----------|-----------|-------|
|           | Exposed  | Unexposed |       |
| Exposed   | 38       | 30        | 68    |
| Unexposed | 62       | 70        | 132   |
| Total     | 100      | 100       | 200   |

McNemar's chi2(1) = 11.13 Prob > chi2 = 0.0008  
 Exact McNemar significance probability = 0.0011

Proportion with factor

|            |         |                      |                  |
|------------|---------|----------------------|------------------|
| Cases      | .34     |                      |                  |
| Controls   | .5      | [95% Conf. Interval] |                  |
| difference | -.16    | -.2563436            | -.0636564        |
| ratio      | .68     | .5413779             | .8541168         |
| rel. diff. | -.32    | -.5359877            | -.1040123        |
| odds ratio | .483871 | .302022              | .7598215 (exact) |

37 . mcci 23 30 77 70

| Cases     | Controls |           | Total |
|-----------|----------|-----------|-------|
|           | Exposed  | Unexposed |       |
| Exposed   | 23       | 30        | 53    |
| Unexposed | 77       | 70        | 147   |
| Total     | 100      | 100       | 200   |

McNemar's chi2(1) = 20.64 Prob > chi2 = 0.0000  
 Exact McNemar significance probability = 0.0000

Proportion with factor

|            |          |                      |                  |
|------------|----------|----------------------|------------------|
| Cases      | .265     |                      |                  |
| Controls   | .5       | [95% Conf. Interval] |                  |
| difference | -.235    | -.3359957            | -.1340043        |
| ratio      | .53      | .4011726             | .7001973         |
| rel. diff. | -.47     | -.7158095            | -.2241905        |
| odds ratio | .3896104 | .2466073             | .6011999 (exact) |

38 . mcci 32 57 68 43

| Cases     | Controls |           | Total |
|-----------|----------|-----------|-------|
|           | Exposed  | Unexposed |       |
| Exposed   | 32       | 57        | 89    |
| Unexposed | 68       | 43        | 111   |
| Total     | 100      | 100       | 200   |

McNemar's chi2(1) = 0.97 Prob > chi2 = 0.3252  
 Exact McNemar significance probability = 0.3712

Proportion with factor

|            |       |                      |          |
|------------|-------|----------------------|----------|
| Cases      | .445  |                      |          |
| Controls   | .5    | [95% Conf. Interval] |          |
| difference | -.055 | -.1692998            | .0592998 |
| ratio      | .89   | .7055259             | 1.122709 |
| rel. diff. | -.11  | -.3408684            | .1208684 |

odds ratio **.8382353** **.5789865** **1.209703** (exact)

39 . mcci 27 38 77 62

| Cases     | Controls |           | Total |
|-----------|----------|-----------|-------|
|           | Exposed  | Unexposed |       |
| Exposed   | 27       | 38        | 65    |
| Unexposed | 77       | 62        | 139   |
| Total     | 104      | 100       | 204   |

McNemar's chi2(1) = **13.23** Prob > chi2 = **0.0003**  
 Exact McNemar significance probability = **0.0004**

Proportion with factor

|            |                  |                      |                         |
|------------|------------------|----------------------|-------------------------|
| Cases      | <b>.3186275</b>  |                      |                         |
| Controls   | <b>.5098039</b>  | [95% Conf. Interval] |                         |
| difference | <b>-.1911765</b> | <b>-.2957133</b>     | <b>-.0866397</b>        |
| ratio      | <b>.625</b>      | <b>.4840144</b>      | <b>.8070524</b>         |
| rel. diff. | <b>-.39</b>      | <b>-.6378018</b>     | <b>-.1421982</b>        |
| odds ratio | <b>.4935065</b>  | <b>.3254703</b>      | <b>.7369959</b> (exact) |

40 . mcci 27 38 73 62

| Cases     | Controls |           | Total |
|-----------|----------|-----------|-------|
|           | Exposed  | Unexposed |       |
| Exposed   | 27       | 38        | 65    |
| Unexposed | 73       | 62        | 135   |
| Total     | 100      | 100       | 200   |

McNemar's chi2(1) = **11.04** Prob > chi2 = **0.0009**  
 Exact McNemar significance probability = **0.0012**

Proportion with factor

|            |                 |                      |                        |
|------------|-----------------|----------------------|------------------------|
| Cases      | <b>.325</b>     |                      |                        |
| Controls   | <b>.5</b>       | [95% Conf. Interval] |                        |
| difference | <b>-.175</b>    | <b>-.2803585</b>     | <b>-.0696415</b>       |
| ratio      | <b>.65</b>      | <b>.5031291</b>      | <b>.8397447</b>        |
| rel. diff. | <b>-.35</b>     | <b>-.5899255</b>     | <b>-.1100745</b>       |
| odds ratio | <b>.5205479</b> | <b>.3421121</b>      | <b>.780705</b> (exact) |

41 . mcci 38 62 27 73

| Cases     | Controls |           | Total |
|-----------|----------|-----------|-------|
|           | Exposed  | Unexposed |       |
| Exposed   | 38       | 62        | 100   |
| Unexposed | 27       | 73        | 100   |
| Total     | 65       | 135       | 200   |

McNemar's chi2(1) = **13.76** Prob > chi2 = **0.0002**  
 Exact McNemar significance probability = **0.0003**

Proportion with factor

|            |          |                      |                  |
|------------|----------|----------------------|------------------|
| Cases      | .5       | [95% Conf. Interval] |                  |
| Controls   | .325     |                      |                  |
| difference | .175     | .0807866             | .2692134         |
| ratio      | 1.538462 | 1.223162             | 1.935037         |
| rel. diff. | .2592593 | .1413786             | .3771399         |
| odds ratio | 2.296296 | 1.439525             | 3.753994 (exact) |

42 . mcci 31 69 38 62

| Cases     | Controls |           | Total |
|-----------|----------|-----------|-------|
|           | Exposed  | Unexposed |       |
| Exposed   | 31       | 69        | 100   |
| Unexposed | 38       | 62        | 100   |
| Total     | 69       | 131       | 200   |

McNemar's chi2(1) = 8.98 Prob > chi2 = 0.0027  
 Exact McNemar significance probability = 0.0035

Proportion with factor

|            |          |                      |                  |
|------------|----------|----------------------|------------------|
| Cases      | .5       | [95% Conf. Interval] |                  |
| Controls   | .345     |                      |                  |
| difference | .155     | .0509321             | .2590679         |
| ratio      | 1.449275 | 1.135409             | 1.849905         |
| rel. diff. | .2366412 | .1014237             | .3718588         |
| odds ratio | 1.815789 | 1.204996             | 2.773495 (exact) |

43 . mcci 27 73 36 64

| Cases     | Controls |           | Total |
|-----------|----------|-----------|-------|
|           | Exposed  | Unexposed |       |
| Exposed   | 27       | 73        | 100   |
| Unexposed | 36       | 64        | 100   |
| Total     | 63       | 137       | 200   |

McNemar's chi2(1) = 12.56 Prob > chi2 = 0.0004  
 Exact McNemar significance probability = 0.0005

Proportion with factor

|            |          |                      |                  |
|------------|----------|----------------------|------------------|
| Cases      | .5       | [95% Conf. Interval] |                  |
| Controls   | .315     |                      |                  |
| difference | .185     | .0809515             | .2890485         |
| ratio      | 1.587302 | 1.226581             | 2.054105         |
| rel. diff. | .270073  | .1424642             | .3976818         |
| odds ratio | 2.027778 | 1.342629             | 3.112423 (exact) |



44 . mcci 38 62 30 70

| Cases     | Controls |           | Total |
|-----------|----------|-----------|-------|
|           | Exposed  | Unexposed |       |
| Exposed   | 38       | 62        | 100   |
| Unexposed | 30       | 70        | 100   |
| Total     | 68       | 132       | 200   |

McNemar's chi2(1) = 11.13 Prob > chi2 = 0.0008  
 Exact McNemar significance probability = 0.0011

Proportion with factor

|            |          |                      |                  |
|------------|----------|----------------------|------------------|
| Cases      | .5       |                      |                  |
| Controls   | .34      | [95% Conf. Interval] |                  |
| difference | .16      | .0636564             | .2563436         |
| ratio      | 1.470588 | 1.1708               | 1.847138         |
| rel. diff. | .2424242 | .1184644             | .3663841         |
| odds ratio | 2.066667 | 1.316099             | 3.311017 (exact) |

45 . mcci 23 77 30 70

| Cases     | Controls |           | Total |
|-----------|----------|-----------|-------|
|           | Exposed  | Unexposed |       |
| Exposed   | 23       | 77        | 100   |
| Unexposed | 30       | 70        | 100   |
| Total     | 53       | 147       | 200   |

McNemar's chi2(1) = 20.64 Prob > chi2 = 0.0000  
 Exact McNemar significance probability = 0.0000

Proportion with factor

|            |          |                      |                  |
|------------|----------|----------------------|------------------|
| Cases      | .5       |                      |                  |
| Controls   | .265     | [95% Conf. Interval] |                  |
| difference | .235     | .1340043             | .3359957         |
| ratio      | 1.886792 | 1.428169             | 2.492692         |
| rel. diff. | .3197279 | .2059746             | .4334812         |
| odds ratio | 2.566667 | 1.66334              | 4.055031 (exact) |

46 . mcci 32 68 57 43

| Cases     | Controls |           | Total |
|-----------|----------|-----------|-------|
|           | Exposed  | Unexposed |       |
| Exposed   | 32       | 68        | 100   |
| Unexposed | 57       | 43        | 100   |
| Total     | 89       | 111       | 200   |

McNemar's chi2(1) = 0.97 Prob > chi2 = 0.3252  
 Exact McNemar significance probability = 0.3712

Proportion with factor

|            |          |                      |          |
|------------|----------|----------------------|----------|
| Cases      | .5       |                      |          |
| Controls   | .445     | [95% Conf. Interval] |          |
| difference | .055     | -.0592998            | .1692998 |
| ratio      | 1.123596 | .890703              | 1.417382 |
| rel. diff. | .0990991 | -.0882789            | .2864771 |

odds ratio **1.192982** **.8266492** **1.727156** (exact)

47 . mcci 11 89 17 83

| Cases     | Controls  |            | Total      |
|-----------|-----------|------------|------------|
|           | Exposed   | Unexposed  |            |
| Exposed   | <b>11</b> | <b>89</b>  | <b>100</b> |
| Unexposed | <b>17</b> | <b>83</b>  | <b>100</b> |
| Total     | <b>28</b> | <b>172</b> | <b>200</b> |

McNemar's chi2(1) = **48.91** Prob > chi2 = **0.0000**  
 Exact McNemar significance probability = **0.0000**

Proportion with factor

|            |                 |                      |                         |
|------------|-----------------|----------------------|-------------------------|
| Cases      | <b>.5</b>       |                      |                         |
| Controls   | <b>.14</b>      | [95% Conf. Interval] |                         |
| difference | <b>.36</b>      | <b>.2673039</b>      | <b>.4526961</b>         |
| ratio      | <b>3.571429</b> | <b>2.439071</b>      | <b>5.229492</b>         |
| rel. diff. | <b>.4186047</b> | <b>.3291489</b>      | <b>.5080604</b>         |
| odds ratio | <b>5.235294</b> | <b>3.093052</b>      | <b>9.385099</b> (exact) |

48 . mcci 30 70 36 64

| Cases     | Controls  |            | Total      |
|-----------|-----------|------------|------------|
|           | Exposed   | Unexposed  |            |
| Exposed   | <b>30</b> | <b>70</b>  | <b>100</b> |
| Unexposed | <b>36</b> | <b>64</b>  | <b>100</b> |
| Total     | <b>66</b> | <b>134</b> | <b>200</b> |

McNemar's chi2(1) = **10.91** Prob > chi2 = **0.0010**  
 Exact McNemar significance probability = **0.0012**

Proportion with factor

|            |                 |                      |                        |
|------------|-----------------|----------------------|------------------------|
| Cases      | <b>.5</b>       |                      |                        |
| Controls   | <b>.33</b>      | [95% Conf. Interval] |                        |
| difference | <b>.17</b>      | <b>.0668941</b>      | <b>.2731059</b>        |
| ratio      | <b>1.515152</b> | <b>1.181906</b>      | <b>1.942358</b>        |
| rel. diff. | <b>.2537313</b> | <b>.1236414</b>      | <b>.3838213</b>        |
| odds ratio | <b>1.944444</b> | <b>1.283019</b>      | <b>2.99287</b> (exact) |

49 . mcci 38 62 46 54

| Cases     | Controls  |            | Total      |
|-----------|-----------|------------|------------|
|           | Exposed   | Unexposed  |            |
| Exposed   | <b>38</b> | <b>62</b>  | <b>100</b> |
| Unexposed | <b>46</b> | <b>54</b>  | <b>100</b> |
| Total     | <b>84</b> | <b>116</b> | <b>200</b> |

McNemar's chi2(1) = **2.37** Prob > chi2 = **0.1237**  
 Exact McNemar significance probability = **0.1486**

Proportion with factor

|            |          |                      |                  |
|------------|----------|----------------------|------------------|
| Cases      | .5       |                      |                  |
| Controls   | .42      | [95% Conf. Interval] |                  |
| difference | .08      | -.0262374            | .1862374         |
| ratio      | 1.190476 | .9532428             | 1.48675          |
| rel. diff. | .137931  | -.025101             | .3009631         |
| odds ratio | 1.347826 | .9056707             | 2.018695 (exact) |

50 . mcci 29 71 36 64

| Cases     | Controls |           | Total |
|-----------|----------|-----------|-------|
|           | Exposed  | Unexposed |       |
| Exposed   | 29       | 71        | 100   |
| Unexposed | 36       | 64        | 100   |
| Total     | 65       | 135       | 200   |

McNemar's chi2(1) = 11.45 Prob > chi2 = 0.0007  
 Exact McNemar significance probability = 0.0009

Proportion with factor

|            |          |                      |                  |
|------------|----------|----------------------|------------------|
| Cases      | .5       |                      |                  |
| Controls   | .325     | [95% Conf. Interval] |                  |
| difference | .175     | .071574              | .278426          |
| ratio      | 1.538462 | 1.196397             | 1.978326         |
| rel. diff. | .2592593 | .1300066             | .3885119         |
| odds ratio | 1.972222 | 1.302884             | 3.032726 (exact) |

51 . mcci 35 65 50 50

| Cases     | Controls |           | Total |
|-----------|----------|-----------|-------|
|           | Exposed  | Unexposed |       |
| Exposed   | 35       | 65        | 100   |
| Unexposed | 50       | 50        | 100   |
| Total     | 85       | 115       | 200   |

McNemar's chi2(1) = 1.96 Prob > chi2 = 0.1619  
 Exact McNemar significance probability = 0.1915

Proportion with factor

|            |          |                      |                  |
|------------|----------|----------------------|------------------|
| Cases      | .5       |                      |                  |
| Controls   | .425     | [95% Conf. Interval] |                  |
| difference | .075     | -.0345761            | .1845761         |
| ratio      | 1.176471 | .93664               | 1.477711         |
| rel. diff. | .1304348 | -.0399969            | .3008664         |
| odds ratio | 1.3      | .8853415             | 1.918866 (exact) |

52 . mcci mcci 26 74 43 57  
 'mcci' found where integer expected  
 r(7);

53 . mcci 26 74 43 57

| Cases     | Controls |           | Total |
|-----------|----------|-----------|-------|
|           | Exposed  | Unexposed |       |
| Exposed   | 26       | 74        | 100   |
| Unexposed | 43       | 57        | 100   |
| Total     | 69       | 131       | 200   |

McNemar's chi2(1) = 8.21 Prob > chi2 = 0.0042  
 Exact McNemar significance probability = 0.0053

Proportion with factor

|            |          |                      |                  |
|------------|----------|----------------------|------------------|
| Cases      | .5       |                      |                  |
| Controls   | .345     | [95% Conf. Interval] |                  |
| difference | .155     | .0461982             | .2638018         |
| ratio      | 1.449275 | 1.122819             | 1.870648         |
| rel. diff. | .2366412 | .0952462             | .3780362         |
| odds ratio | 1.72093  | 1.166236             | 2.567698 (exact) |

54 . mcci 32 68 36 64

| Cases     | Controls |           | Total |
|-----------|----------|-----------|-------|
|           | Exposed  | Unexposed |       |
| Exposed   | 32       | 68        | 100   |
| Unexposed | 36       | 64        | 100   |
| Total     | 68       | 132       | 200   |

McNemar's chi2(1) = 9.85 Prob > chi2 = 0.0017  
 Exact McNemar significance probability = 0.0022

Proportion with factor

|            |          |                      |                  |
|------------|----------|----------------------|------------------|
| Cases      | .5       |                      |                  |
| Controls   | .34      | [95% Conf. Interval] |                  |
| difference | .16      | .0575521             | .2624479         |
| ratio      | 1.470588 | 1.154047             | 1.873953         |
| rel. diff. | .2424242 | .1106277             | .3742207         |
| odds ratio | 1.888889 | 1.243302             | 2.913145 (exact) |

55 . mcci 35 65 32 68

| Cases     | Controls |           | Total |
|-----------|----------|-----------|-------|
|           | Exposed  | Unexposed |       |
| Exposed   | 35       | 65        | 100   |
| Unexposed | 32       | 68        | 100   |
| Total     | 67       | 133       | 200   |

McNemar's chi2(1) = 11.23 Prob > chi2 = 0.0008  
 Exact McNemar significance probability = 0.0010

Proportion with factor

|            |                 |                      |                         |
|------------|-----------------|----------------------|-------------------------|
| Cases      | <b>.5</b>       | [95% Conf. Interval] |                         |
| Controls   | <b>.335</b>     |                      |                         |
| difference | <b>.165</b>     | <b>.066231</b>       | <b>.263769</b>          |
| ratio      | <b>1.492537</b> | <b>1.178979</b>      | <b>1.889489</b>         |
| rel. diff. | <b>.2481203</b> | <b>.1222694</b>      | <b>.3739713</b>         |
| odds ratio | <b>2.03125</b>  | <b>1.310852</b>      | <b>3.205978</b> (exact) |

56 . mcci 26 74 44 66

| Cases     | Controls  |            | Total      |
|-----------|-----------|------------|------------|
|           | Exposed   | Unexposed  |            |
| Exposed   | <b>26</b> | <b>74</b>  | <b>100</b> |
| Unexposed | <b>44</b> | <b>66</b>  | <b>110</b> |
| Total     | <b>70</b> | <b>140</b> | <b>210</b> |

McNemar's chi2(1) = **7.63** Prob > chi2 = **0.0057**  
 Exact McNemar significance probability = **0.0073**

Proportion with factor

|            |                 |                      |                         |
|------------|-----------------|----------------------|-------------------------|
| Cases      | <b>.4761905</b> | [95% Conf. Interval] |                         |
| Controls   | <b>.3333333</b> |                      |                         |
| difference | <b>.1428571</b> | <b>.0385693</b>      | <b>.247145</b>          |
| ratio      | <b>1.428571</b> | <b>1.107608</b>      | <b>1.842544</b>         |
| rel. diff. | <b>.2142857</b> | <b>.0794846</b>      | <b>.3490868</b>         |
| odds ratio | <b>1.681818</b> | <b>1.142787</b>      | <b>2.501097</b> (exact) |

57 . mcci 26 74 44 56

| Cases     | Controls  |            | Total      |
|-----------|-----------|------------|------------|
|           | Exposed   | Unexposed  |            |
| Exposed   | <b>26</b> | <b>74</b>  | <b>100</b> |
| Unexposed | <b>44</b> | <b>56</b>  | <b>100</b> |
| Total     | <b>70</b> | <b>130</b> | <b>200</b> |

McNemar's chi2(1) = **7.63** Prob > chi2 = **0.0057**  
 Exact McNemar significance probability = **0.0073**

Proportion with factor

|            |                 |                      |                         |
|------------|-----------------|----------------------|-------------------------|
| Cases      | <b>.5</b>       | [95% Conf. Interval] |                         |
| Controls   | <b>.35</b>      |                      |                         |
| difference | <b>.15</b>      | <b>.0405963</b>      | <b>.2594037</b>         |
| ratio      | <b>1.428571</b> | <b>1.107608</b>      | <b>1.842544</b>         |
| rel. diff. | <b>.2307692</b> | <b>.0871297</b>      | <b>.3744088</b>         |
| odds ratio | <b>1.681818</b> | <b>1.142787</b>      | <b>2.501097</b> (exact) |

58 . mcci 21 79 50 50

| Cases     | Controls |           | Total |
|-----------|----------|-----------|-------|
|           | Exposed  | Unexposed |       |
| Exposed   | 21       | 79        | 100   |
| Unexposed | 50       | 50        | 100   |
| Total     | 71       | 129       | 200   |

McNemar's chi2(1) = 6.52 Prob > chi2 = 0.0107  
 Exact McNemar significance probability = 0.0134

Proportion with factor

|            |          |                      |                  |
|------------|----------|----------------------|------------------|
| Cases      | .5       |                      |                  |
| Controls   | .355     | [95% Conf. Interval] |                  |
| difference | .145     | .0305246             | .2594754         |
| ratio      | 1.408451 | 1.081449             | 1.834329         |
| rel. diff. | .2248062 | .072871              | .3767414         |
| odds ratio | 1.58     | 1.094939             | 2.298845 (exact) |

59 . mcci 25 75 43 57

| Cases     | Controls |           | Total |
|-----------|----------|-----------|-------|
|           | Exposed  | Unexposed |       |
| Exposed   | 25       | 75        | 100   |
| Unexposed | 43       | 57        | 100   |
| Total     | 68       | 132       | 200   |

McNemar's chi2(1) = 8.68 Prob > chi2 = 0.0032  
 Exact McNemar significance probability = 0.0041

Proportion with factor

|            |          |                      |                  |
|------------|----------|----------------------|------------------|
| Cases      | .5       |                      |                  |
| Controls   | .34      | [95% Conf. Interval] |                  |
| difference | .16      | .0508818             | .2691182         |
| ratio      | 1.470588 | 1.135957             | 1.903796         |
| rel. diff. | .2424242 | .1020368             | .3828117         |
| odds ratio | 1.744186 | 1.183316             | 2.600014 (exact) |

60 . mcci 25 75 42 58

| Cases     | Controls |           | Total |
|-----------|----------|-----------|-------|
|           | Exposed  | Unexposed |       |
| Exposed   | 25       | 75        | 100   |
| Unexposed | 42       | 58        | 100   |
| Total     | 67       | 133       | 200   |

McNemar's chi2(1) = 9.31 Prob > chi2 = 0.0023  
 Exact McNemar significance probability = 0.0029

Proportion with factor

|            |          |                      |          |
|------------|----------|----------------------|----------|
| Cases      | .5       |                      |          |
| Controls   | .335     | [95% Conf. Interval] |          |
| difference | .165     | .0564947             | .2735053 |
| ratio      | 1.492537 | 1.151972             | 1.933786 |
| rel. diff. | .2481203 | .1099026             | .386338  |

odds ratio **1.785714** **1.208114** **2.671076** (exact)

61 . mcci 27 73 37 63

| Cases     | Controls |           | Total |
|-----------|----------|-----------|-------|
|           | Exposed  | Unexposed |       |
| Exposed   | 27       | 73        | 100   |
| Unexposed | 37       | 63        | 100   |
| Total     | 64       | 136       | 200   |

McNemar's chi2(1) = **11.78** Prob > chi2 = **0.0006**  
 Exact McNemar significance probability = **0.0008**

Proportion with factor

|            |          |                      |                  |
|------------|----------|----------------------|------------------|
| Cases      | .5       |                      |                  |
| Controls   | .32      | [95% Conf. Interval] |                  |
| difference | .18      | .0752919             | .2847081         |
| ratio      | 1.5625   | 1.208444             | 2.020289         |
| rel. diff. | .2647059 | .1350966             | .3943152         |
| odds ratio | 1.972973 | 1.311021             | 3.014824 (exact) |

62 . mcci 40 60 38 62

| Cases     | Controls |           | Total |
|-----------|----------|-----------|-------|
|           | Exposed  | Unexposed |       |
| Exposed   | 40       | 60        | 100   |
| Unexposed | 38       | 62        | 100   |
| Total     | 78       | 122       | 200   |

McNemar's chi2(1) = **4.94** Prob > chi2 = **0.0263**  
 Exact McNemar significance probability = **0.0334**

Proportion with factor

|            |          |                      |                  |
|------------|----------|----------------------|------------------|
| Cases      | .5       |                      |                  |
| Controls   | .39      | [95% Conf. Interval] |                  |
| difference | .11      | .009192              | .210808          |
| ratio      | 1.282051 | 1.029187             | 1.597042         |
| rel. diff. | .1803279 | .0363415             | .3243142         |
| odds ratio | 1.578947 | 1.034531             | 2.436768 (exact) |

63 . mcci 32 57 68 43

| Cases     | Controls |           | Total |
|-----------|----------|-----------|-------|
|           | Exposed  | Unexposed |       |
| Exposed   | 32       | 57        | 89    |
| Unexposed | 68       | 43        | 111   |
| Total     | 100      | 100       | 200   |

McNemar's chi2(1) = **0.97** Prob > chi2 = **0.3252**  
 Exact McNemar significance probability = **0.3712**

Proportion with factor

|            |                 |                  |                         |
|------------|-----------------|------------------|-------------------------|
| Cases      | <b>.445</b>     |                  |                         |
| Controls   | <b>.5</b>       |                  | [95% Conf. Interval]    |
| difference | <b>-.055</b>    | <b>-.1692998</b> | <b>.0592998</b>         |
| ratio      | <b>.89</b>      | <b>.7055259</b>  | <b>1.122709</b>         |
| rel. diff. | <b>-.11</b>     | <b>-.3408684</b> | <b>.1208684</b>         |
| odds ratio | <b>.8382353</b> | <b>.5789865</b>  | <b>1.209703</b> (exact) |

64 . mcci 32 68 57 43

| Cases     | Controls  |            | Total      |
|-----------|-----------|------------|------------|
|           | Exposed   | Unexposed  |            |
| Exposed   | <b>32</b> | <b>68</b>  | <b>100</b> |
| Unexposed | <b>57</b> | <b>43</b>  | <b>100</b> |
| Total     | <b>89</b> | <b>111</b> | <b>200</b> |

McNemar's chi2(1) = **0.97** Prob > chi2 = **0.3252**  
 Exact McNemar significance probability = **0.3712**

Proportion with factor

|            |                 |                  |                         |
|------------|-----------------|------------------|-------------------------|
| Cases      | <b>.5</b>       |                  |                         |
| Controls   | <b>.445</b>     |                  | [95% Conf. Interval]    |
| difference | <b>.055</b>     | <b>-.0592998</b> | <b>.1692998</b>         |
| ratio      | <b>1.123596</b> | <b>.890703</b>   | <b>1.417382</b>         |
| rel. diff. | <b>.0990991</b> | <b>-.0882789</b> | <b>.2864771</b>         |
| odds ratio | <b>1.192982</b> | <b>.8266492</b>  | <b>1.727156</b> (exact) |

65 .
